# Supplementary material for: Contributions of wheat and maize residues to soil organic carbon under long-term rotation in north China
Source: PubMed Central journal article supplement (PMC4650633; doi:10.1038/srep11409), 2015-06-23
Supplement: srep11409-s1.pdf [file srep11409-s1.pdf]

## **Contributions of wheat and maize residues to soil organic carbon under long-term rotation in north China**

Jinzhou Wang<sup>1,2,3</sup>, Xiujun Wang<sup>4,2,5</sup> \*, Minggang Xu<sup>1</sup>, Gu Feng<sup>3</sup>, Wenju Zhang<sup>1</sup>, Xueyun Yang<sup>6</sup>, Shaomin Huang<sup>7</sup>

<sup>1</sup>Ministry of Agriculture Key Laboratory of Crop Nutrition and Fertilization, Institute of Agricultural Resources and Regional Planning, Chinese Academy of Agricultural Sciences, Beijing 100081, China,

<sup>2</sup>Earth System Science Interdisciplinary Center, University of Maryland, College Park, MD 20740, USA,

<sup>3</sup>College of Resources and Environmental Sciences, China Agricultural University, Beijing 100094, China,

<sup>4</sup>College of Global Change and Earth System Science, Beijing Normal University, Xijiekouwai Street No.19, Haidian District, Beijing 100875, and Joint Center for Global Change Studies, Beijing 100875, China,

<sup>5</sup>State Key Laboratory of Desert and Oasis Ecology, Xinjiang Institute of Ecology and Geography, Chinese Academy of Sciences, Urumqi, Xinjiang 830011, China

<sup>6</sup>College of Natural Resources and Environment, Northwest Agricultural and Forestry Science and Technology University, Yangling, Shaanxi 712100, China,

<sup>7</sup>Institute of Plant Nutrition, Resources and Environment, Henan Academy of Agricultural Sciences, Zhengzhou, Henan 450002, China.

\* **Correspondence:** X.J.W. (wwang@essic.umd.edu)

## Supplementary Table and Figure

**Table S1** Analysis of variance for  $\delta^{13}\text{C}$  value of SOC

| Source of variation | Degree of freedom | Sum of squares | Mean of squares | F value | P value |
|---------------------|-------------------|----------------|-----------------|---------|---------|
| Site                | 2                 | 5.35           | 2.68            | 13.64   | <0.001  |
| Year                | 1                 | 1.63           | 1.63            | 8.29    | 0.005   |
| Treatment           | 2                 | 1.07           | 0.53            | 2.73    | 0.072   |
| Depth               | 4                 | 4.36           | 1.09            | 5.55    | < 0.001 |
| Site*treatment      | 4                 | 6.10           | 1.53            | 7.78    | < 0.001 |
| Site*depth          | 8                 | 3.20           | 0.40            | 2.04    | 0.055   |
| Residual            | 68                | 13.34          | 0.20            |         |         |
| Total               | 89                | 35.05          |                 |         |         |

**Table S2** Amounts of nitrogen, phosphorus, and potassium applied for each crop  
(after Zhao *et al.* <sup>40</sup>)

| Treatments                                                 | Urumqi              |       | Yangling            |       | Zhengzhou           |                     |
|------------------------------------------------------------|---------------------|-------|---------------------|-------|---------------------|---------------------|
|                                                            | Wheat/maize         | Maize | Wheat               | Maize | Wheat               |                     |
| <u>Nitrogen</u> / kg N ha <sup>-1</sup> yr <sup>-1</sup>   |                     |       |                     |       |                     |                     |
| CK                                                         | 0                   | 0     | 0                   | 0     | 0                   | 0                   |
| NPK                                                        | 242                 | 188   | 165                 | 188   | 165                 | 165                 |
| NPKS                                                       | 217+29 <sup>a</sup> | 188   | 165+43 <sup>a</sup> | 188   | 123+42 <sup>a</sup> | 123+42 <sup>a</sup> |
| <u>Phosphorus</u> / kg P ha <sup>-1</sup> yr <sup>-1</sup> |                     |       |                     |       |                     |                     |
| CK                                                         | 0                   | 0     | 0                   | 0     | 0                   | 0                   |
| NPK                                                        | 60                  | 25    | 58                  | 41    | 36                  | 36                  |
| NPKS                                                       | 51+5 <sup>a</sup>   | 25    | 58+4 <sup>a</sup>   | 41    | 36+8 <sup>a</sup>   | 36+8 <sup>a</sup>   |
| <u>Potassium</u> / kg K ha <sup>-1</sup> yr <sup>-1</sup>  |                     |       |                     |       |                     |                     |
| CK                                                         | 0                   | 0     | 0                   | 0     | 0                   | 0                   |
| NPK                                                        | 47                  | 78    | 69                  | 78    | 68                  | 68                  |
| NPKS                                                       | 39+54 <sup>a</sup>  | 78    | 69+57 <sup>a</sup>  | 78    | 68+86 <sup>a</sup>  | 68+86 <sup>a</sup>  |

<sup>a</sup> The amount was from crop straw.

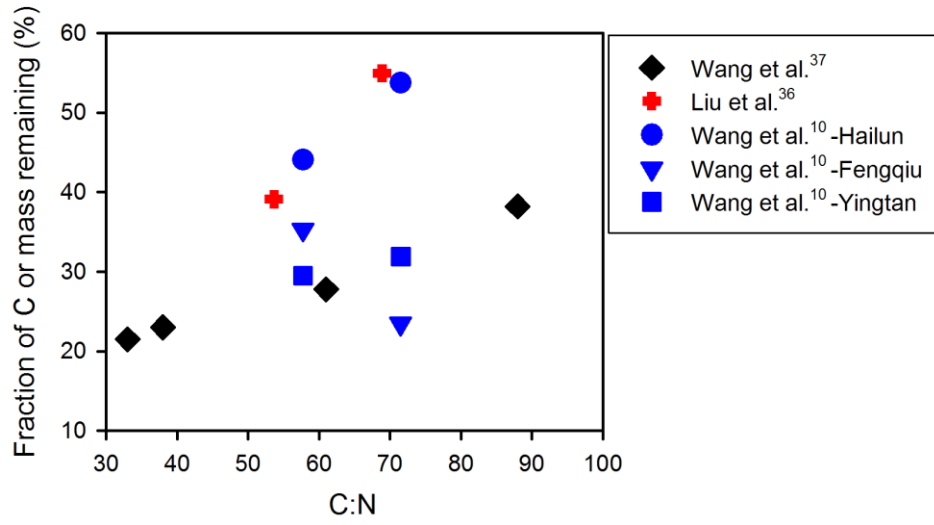

**Figure S1** Relationships between the initial C:N for wheat and maize residues and the fraction of carbon or dry mass remaining after one year of field incubation
